# Supplementary material for: Canine Coronavirus Infection Modulates the Biogenesis and Composition of Cell-Derived Extracellular Vesicles
Source: MDPI journal article supplement (doi:10.3390/biomedicines11030976), 2023-03-21
Supplement: s1 [file s1]

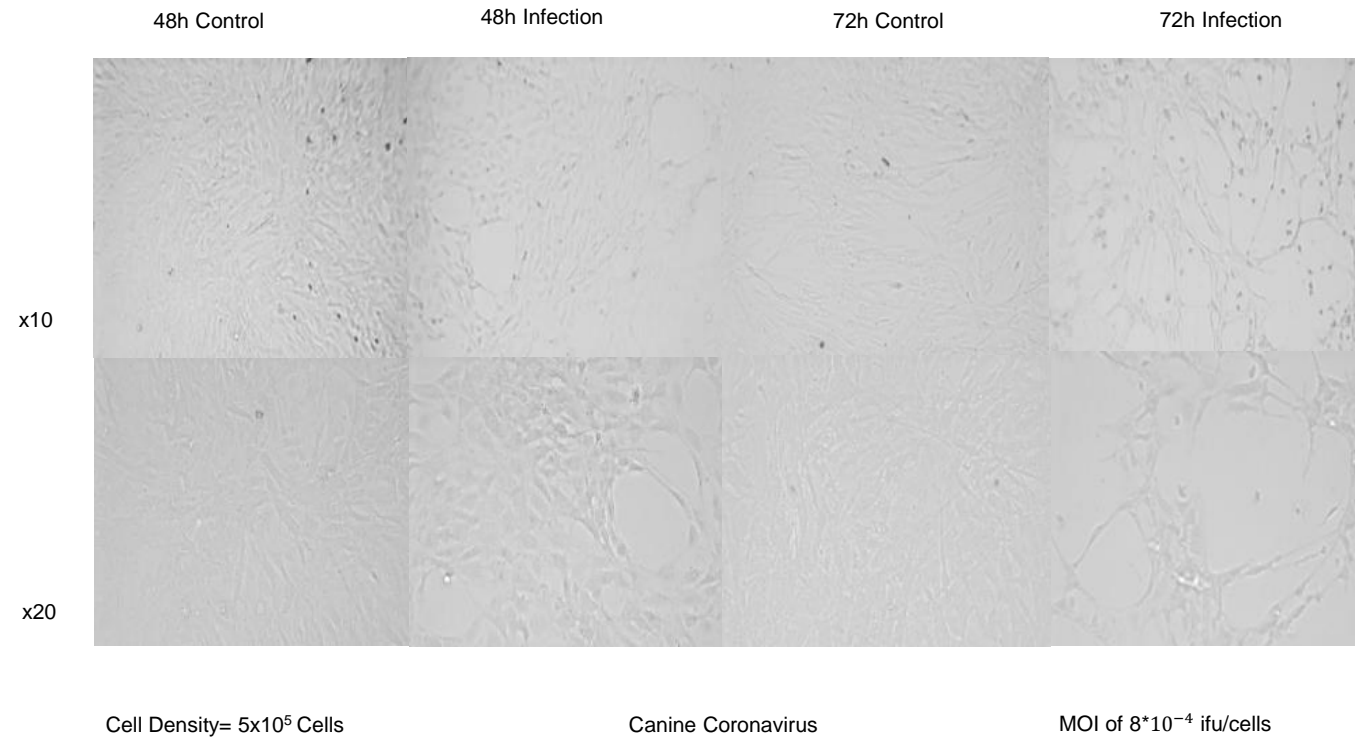

**SUPPLEMENTARY FIGURE 1.** Microscopic images of control uninfected Crandell-Rees Feline Kidney (CRFK) cells and after canine coronavirus (CCoV) infection at the multiplicity of infection (MOI) of 400 infectious unit (IFU) at 48h and 72h post-incubation.

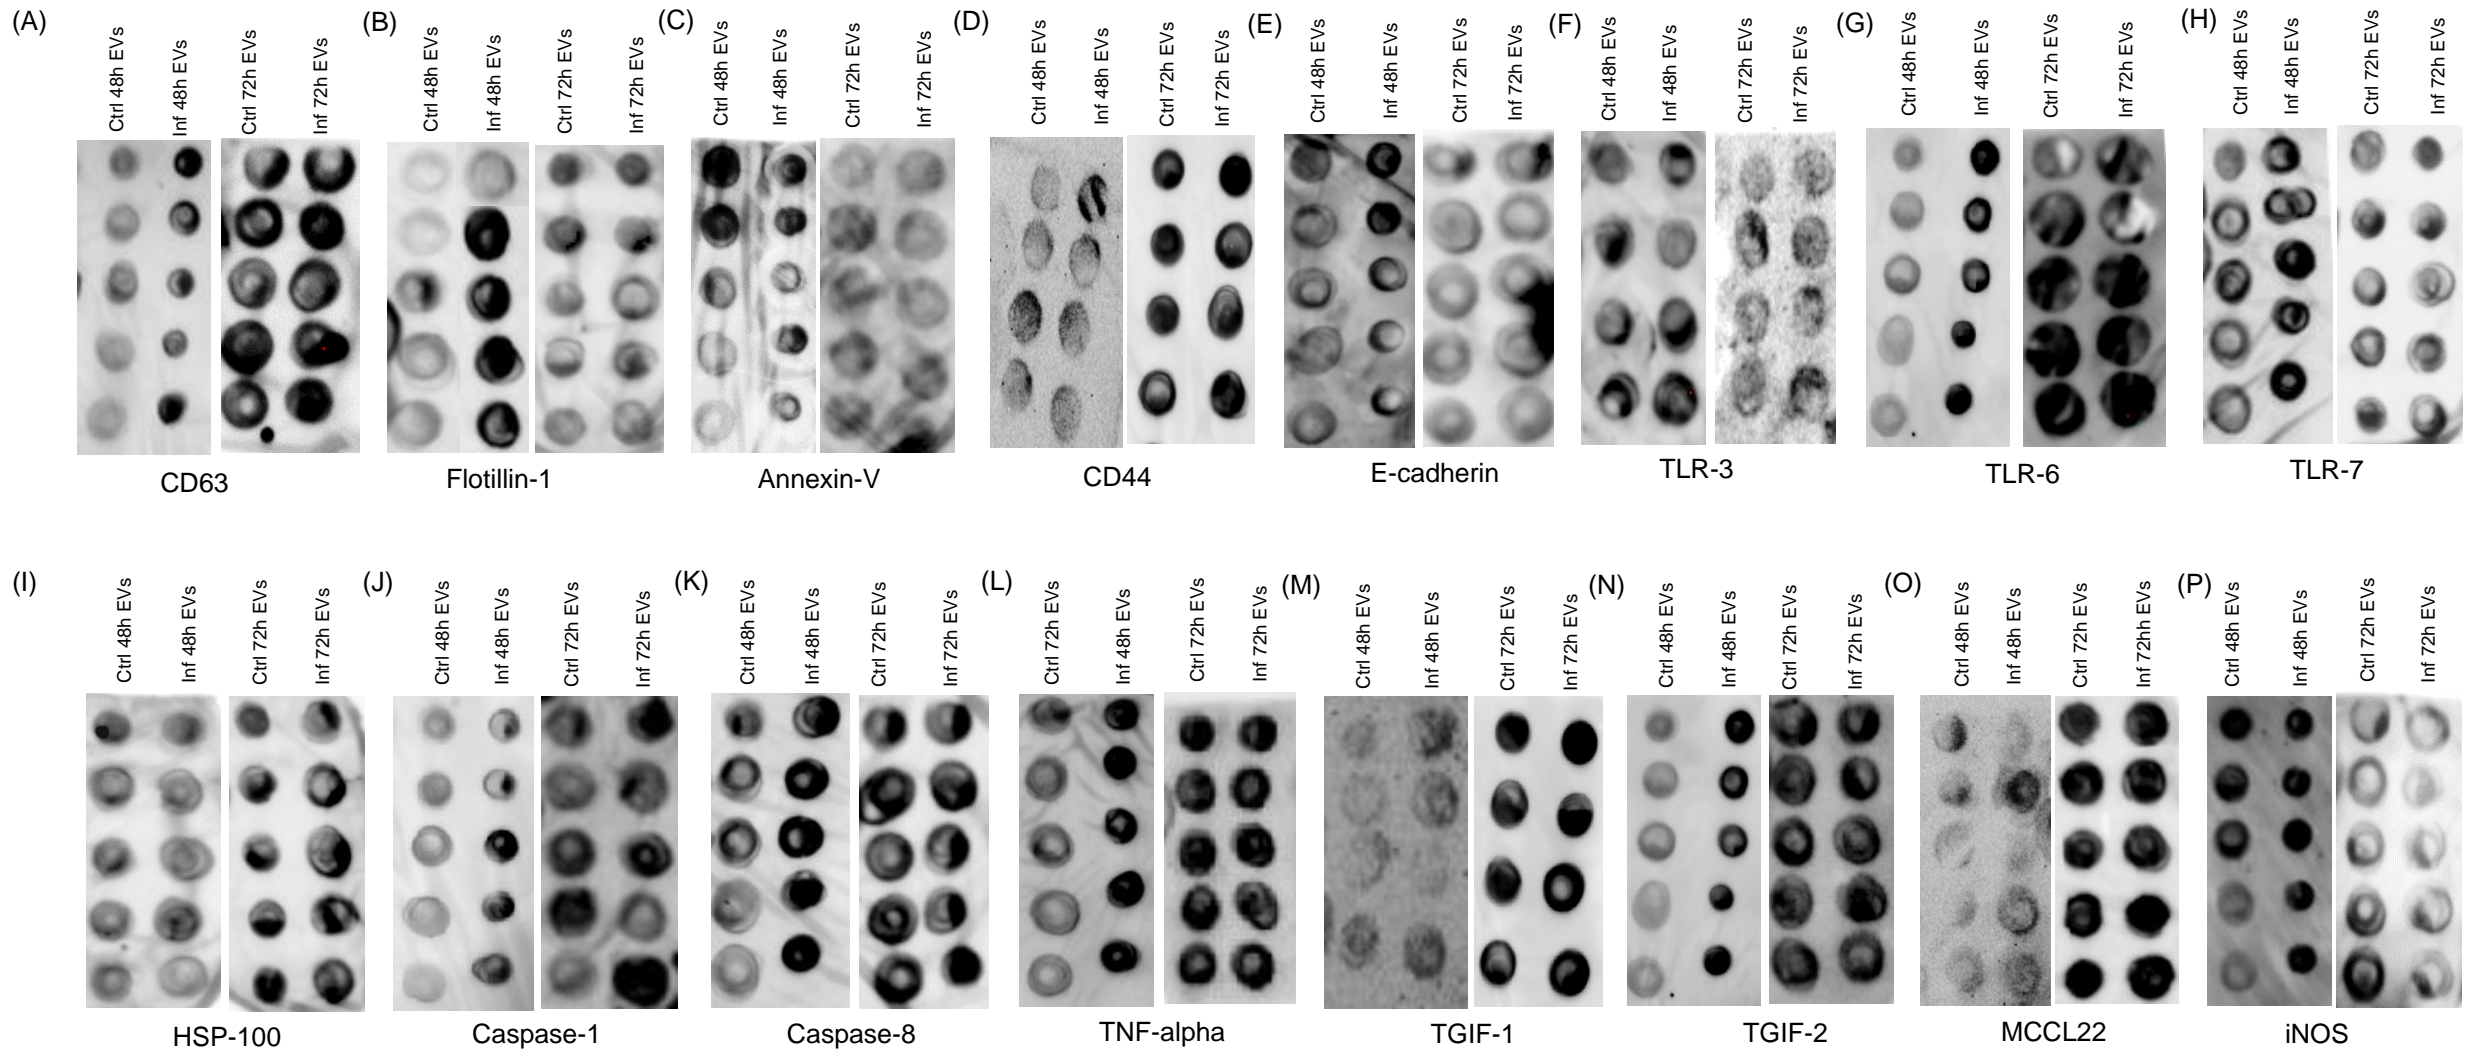

**SUPPLEMENTARY FIGURE 2.** Dot blot images of different EV cargo biomarkers in isolated control and infection EVs from CRFK cells after CCoV infection at 400 IFU at different time points.

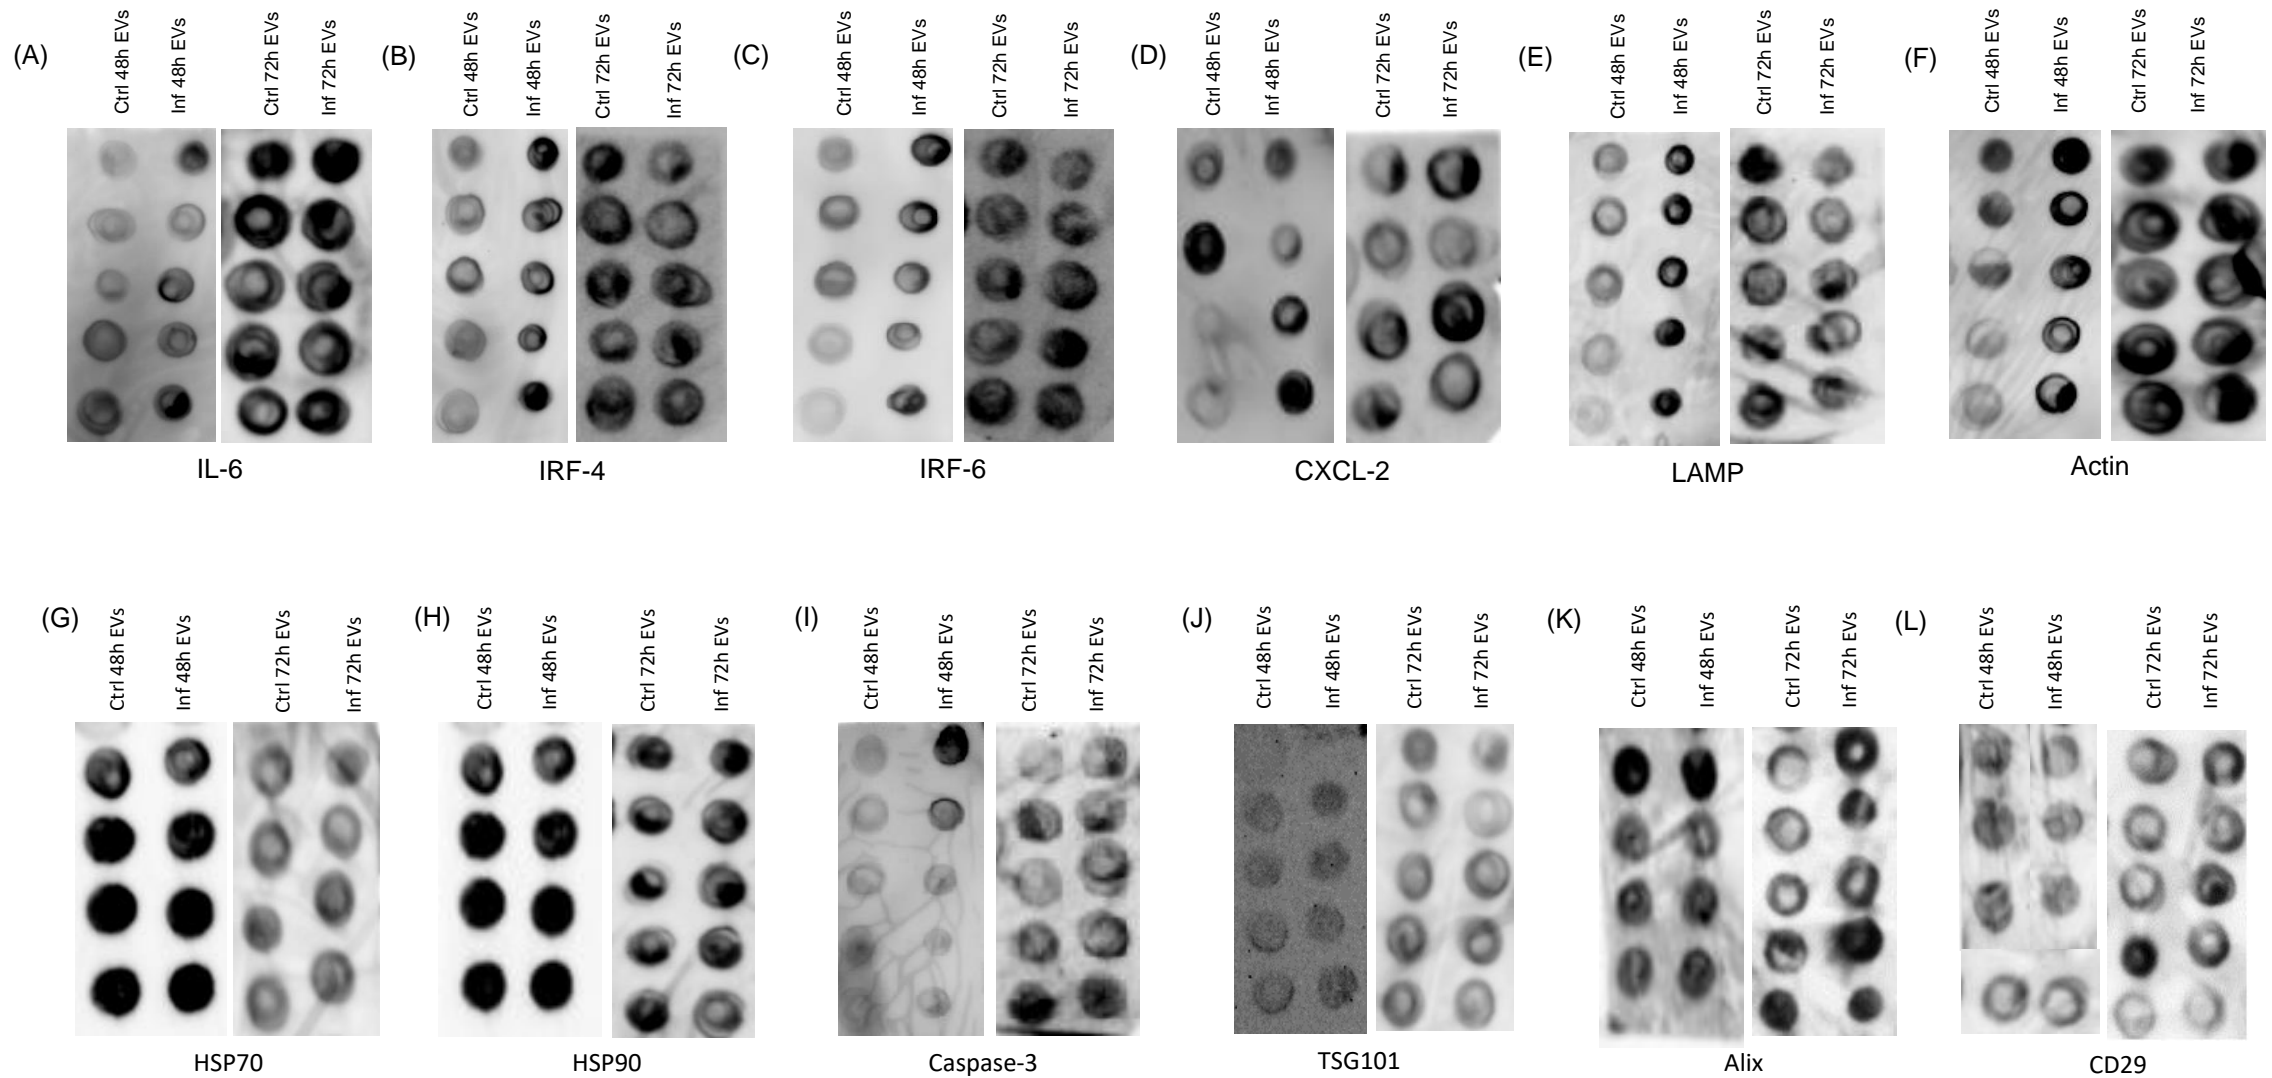

**SUPPLEMENTARY FIGURE 3.** Dot blot images of different EV cargo biomarkers in isolated control and infection EVs from CRFK cells after CCoV infection at 400 IFU at different time points.
